# Supplementary material for: Identification of the first endolysin Cell Binding Domain (CBD) targeting Paenibacillus larvae
Source: Springer Nature journal article supplement (doi:10.1038/s41598-019-39097-2), 2019-02-22
Supplement: 41598_2019_39097_MOESM1_ESM.pdf [file 41598_2019_39097_MOESM1_ESM.pdf]

**Identification of the first endolysin Cell Binding Domain (CBD) targeting  
*Paenibacillus larvae***

Sílvio B Santos<sup>#</sup> and Ana Oliveira<sup>\*\*</sup>, Luís D. R. Melo and Joana Azeredo

CEB - Centre of Biological Engineering, LIBRO - Laboratório de Investigação em Biofilmes Rosário Oliveira, University of Minho, 4710-057 Braga, Portugal.

\*Corresponding Author: [anaoliveira@deb.uminho.pt](mailto:anaoliveira@deb.uminho.pt), Tel. (+351) 253 601968, Fax (+351) 253 604 429.

<sup>#</sup>Both authors contributed equally to this work
